# Supplementary material
Source: PubMed Central journal article supplement (PMC3526183)
Supplement: ismej201280x1.pdf [file ismej201280x1.pdf]

**Table S1.** Biotic and abiotic properties of rock pools used in the study

|                                                         | saline<br>pool | freshwater<br>pool |
|---------------------------------------------------------|----------------|--------------------|
| depth (cm)                                              | 52             | 50                 |
| length (cm)                                             | 645            | 266                |
| width (cm)                                              | 250            | 1267               |
| volume (m <sup>3</sup> )                                | 2.795          | 5.617              |
| temperature (°C)                                        | 26             | 24                 |
| conductivity (μS cm <sup>-1</sup> )                     | 8120           | 260                |
| practical salinity                                      | 4.5            | 0                  |
| pH                                                      | 7.35           | 7.1                |
| DOC (mg L <sup>-1</sup> )                               | 14.1           | 14.4               |
| TN (mg L <sup>-1</sup> )                                | 0.93           | 0.87               |
| TP (mg L <sup>-1</sup> )                                | 0.016          | 0.083              |
| ChIA (μg L <sup>-1</sup> )                              | 10.3           | 24                 |
| bacterial abundance (10 <sup>6</sup> ml <sup>-1</sup> ) | 1.7            | 2.0                |
