# Supplementary material
Source: PubMed Central journal article supplement (PMC3526183)
Supplement: ismej201280x2.pdf [file ismej201280x2.pdf]

**Table S2.** Results of pairwise *post-hoc* comparisons by Tukey's HSD tests for bacterial abundance, individual cell size (ICS), biovolume (BV), bacterial productivity (BP) and specific bacterial productivity (SBP) and by the multivariate version of the *t*-statistic for active bacterial community composition (ABCC).

**Bacterial abundance (BA)**

Experiment 1

| Q\p |   | F      |               | S             |               |
|-----|---|--------|---------------|---------------|---------------|
|     |   | f      | s             | f             | s             |
| F   | f |        | <b>0.0448</b> | <b>0.0017</b> | <b>0.006</b>  |
|     | s | 4.612  |               | <b>0.0001</b> | <b>0.0001</b> |
| S   | f | 13.018 | 17.63         |               | 0.0536        |
|     | s | 9.763  | 14.375        | 3.255         |               |

Experiment 2

| Q\p |   | F-s    |               | S             |               |
|-----|---|--------|---------------|---------------|---------------|
|     |   | f      | s             | f             | s             |
| F-s | f |        | <b>0.0003</b> | <b>0.0001</b> | <b>0.0008</b> |
|     | s | 21.161 |               | <b>0.0001</b> | <b>0.0001</b> |
| S-f | f | 22.477 | 43.638        |               | <b>0.0004</b> |
|     | s | 11.499 | 32.660        | 10.977        |               |

**Individual cell size (ICS)**

Experiment 1

| Q\p |   | F      |        | S      |               |
|-----|---|--------|--------|--------|---------------|
|     |   | f      | s      | f      | s             |
| F   | f |        | 0.1865 | 0.083  | <b>0.0024</b> |
|     | s | 1.760  |        | 0.3399 | <b>0.003</b>  |
| S   | f | 2.843  | 1.073  |        | <b>0.0056</b> |
|     | s | 11.861 | 10.091 | 9.018  |               |

Experiment 2

| Q\p |   | F-s    |        | S             |               |
|-----|---|--------|--------|---------------|---------------|
|     |   | f      | s      | f             | s             |
| F-s | f |        | 0.5704 | <b>0.0011</b> | <b>0.0001</b> |
|     | s | 0.480  |        | <b>0.0016</b> | <b>0.0001</b> |
| S-f | f | 8.986  | 9.465  |               | <b>0.0011</b> |
|     | s | 24.434 | 24.913 | 15.448        |               |

**Biovolume (BV)**

Experiment 1

| Q\p |   | F     |               | S             |               |
|-----|---|-------|---------------|---------------|---------------|
|     |   | f     | s             | f             | s             |
| F   | f |       | <b>0.0439</b> | 0.1536        | 0.0712        |
|     | s | 3.266 |               | <b>0.0034</b> | 0.519         |
| S   | f | 2.020 | 5.296         |               | <b>0.0175</b> |
|     | s | 4.420 | 1.153         | 6.450         |               |

Experiment 2

| Q\p |   | F-s   |               | S             |               |
|-----|---|-------|---------------|---------------|---------------|
|     |   | f     | s             | f             | s             |
| F-s | f |       | <b>0.0372</b> | 0.0682        | 0.057         |
|     | s | 6.095 |               | <b>0.0002</b> | <b>0.0402</b> |
| S-f | f | 4.916 | 1.179         |               | 0.2123        |
|     | s | 5.293 | 0.802         | 0.377         |               |

### Bacterial production (BP)

Experiment 1

| Q\p |   | F     |               | S             |               |
|-----|---|-------|---------------|---------------|---------------|
|     |   | f     | s             | f             | s             |
| F   | f |       | <b>0.0372</b> | 0.0682        | 0.057         |
|     | s | 6.095 |               | <b>0.0002</b> | <b>0.0402</b> |
| S   | f | 4.916 | 1.179         |               | 0.2123        |
|     | s | 5.293 | 0.802         | 0.377         |               |

Experiment 2

| Q\p |   | F-s   |       | S             |               |
|-----|---|-------|-------|---------------|---------------|
|     |   | f     | s     | f             | s             |
| F-s | f |       | 0.85  | <b>0.0201</b> | <b>0.0454</b> |
|     | s | 0.081 |       | <b>0.0133</b> | <b>0.0429</b> |
| S-f | f | 1.891 | 1.972 |               | 0.1323        |
|     | s | 5.587 | 5.668 | 3.696         |               |

### Specific bacterial production (SBP)

Experiment 1

| Q\p |   | F     |              | S            |               |
|-----|---|-------|--------------|--------------|---------------|
|     |   | f     | s            | f            | s             |
| F   | f |       | <b>0.009</b> | 0.0679       | <b>0.0124</b> |
|     | s | 8.776 |              | <b>0.005</b> | 0.1166        |
| S   | f | 4.900 | 3.876        |              | <b>0.0138</b> |
|     | s | 8.114 | 0.662        | 3.214        |               |

Experiment 2

| Q\p |   | F-s   |        | S             |               |
|-----|---|-------|--------|---------------|---------------|
|     |   | f     | s      | f             | s             |
| F-s | f |       | 0.1418 | <b>0.0008</b> | 0.0518        |
|     | s | 1.482 |        | <b>0.0002</b> | <b>0.0185</b> |
| S-f | f | 9.689 | 11.171 |               | 0.0625        |
|     | s | 5.005 | 6.487  | 4.684         |               |

### Active bacterial community composition (ABCC)

Experiment 1

| t\p* |   | F     |               | S             |               |
|------|---|-------|---------------|---------------|---------------|
|      |   | f     | s             | f             | s             |
| F    | f |       | <b>0.0232</b> | <b>0.0025</b> |               |
|      | s | 2.151 |               |               | <b>0.0007</b> |
| S    | f | 3.797 |               |               | <b>0.0308</b> |
|      | s |       | 6.698         | 2.143         |               |

Experiment 2

| t\p* |   | F-s   |               | S-f           |        |
|------|---|-------|---------------|---------------|--------|
|      |   | f     | s             | f             | s      |
| F-s  | f |       | <b>0.0416</b> | <b>0.0033</b> |        |
|      | s | 2.141 |               |               | 0.0514 |
| S-f  | f | 3.485 |               |               | 0.1879 |
|      | s |       | 1.821         | 1.389         |        |

\*  $p$ -values stand for Monte Carlo corrected  $p$ -values.
