# Supplementary material
Source: PubMed Central journal article supplement (PMC3526183)
Supplement: ismej201280x3.pdf [file ismej201280x3.pdf]

**Table S3.** Mean, standard deviation (SD) and p-values of Student's *t*-tests comparing the ratio of habitat generalists to specialists among samples from the same source that were incubated under different conditions.

| Experiment 1 | F-f   | F-s  | S-f   | S-s  |
|--------------|-------|------|-------|------|
| mean ratio   | 2.69  | 2.08 | 1.81  | 2.04 |
| SD           | 0.67  | 0.24 | 1.28  | 0.75 |
| p            | 0.104 |      | 0.401 |      |
| Experiment 2 | F-sf  | F-ss | S-ff  | S-ff |
| mean ratio   | 1.55  | 1.69 | 1.51  | 1.51 |
| SD           | 0.56  | 0.39 | 0.48  | 0.48 |
| p            | 0.372 |      | 0.184 |      |
